# Supplementary material for: Ultra-Processed Food Consumption and Relation with Diet Quality and Mediterranean Diet in Southern Italy
Source: MDPI journal article supplement (doi:10.3390/ijerph191811360), 2022-09-09
Supplement: s1 [file s1]

**Supplementary Table S1.** Percent distribution and standard deviations of food group consumption by level of processing across background variables. P-values indicate statistical differences in ultra-processed food (UPF) consumption between groups.

|                                | Unprocessed/minimally processed foods | Processed culinary ingredients | Processed foods | UPFs        | <i>P-value</i> |
|--------------------------------|---------------------------------------|--------------------------------|-----------------|-------------|----------------|
|                                | <i>mean % (SD)</i>                    |                                |                 |             |                |
| <b>Sex</b>                     |                                       |                                |                 |             | 0.674          |
| Men                            | 37.8 (13.0)                           | 5.6 (2.7)                      | 38.5 (13.7)     | 18.1 (10.0) |                |
| Women                          | 38.3 (12.4)                           | 5.7 (2.7)                      | 38.1 (12.9)     | 17.9 (10.2) |                |
| <b>Age groups</b>              |                                       |                                |                 |             | <0.001         |
| <35 y                          | 36.2 (12.5)                           | 5.3 (2.6)                      | 37.1 (12.7)     | 21.3 (9.9)  |                |
| 35-49 y                        | 39.4 (13.0)                           | 5.4 (2.7)                      | 36.5 (13.6)     | 18.7 (9.8)  |                |
| 50-65 y                        | 40.2 (12.5)                           | 5.3 (2.7)                      | 38.1 (12.3)     | 16.3 (9.4)  |                |
| >65 y                          | 37.2 (12.2)                           | 6.1 (2.6)                      | 42.1 (13.5)     | 14.6 (10.2) |                |
| <b>Marital status</b>          |                                       |                                |                 |             | <0.001         |
| Unmarried/widowed              | 36.6 (13.0)                           | 5.6 (2.6)                      | 38.5 (13.1)     | 19.5 (10.7) |                |
| Married                        | 39.5 (12.4)                           | 5.5 (2.8)                      | 38.1 (13.3)     | 16.9 (9.6)  |                |
| <b>Educational level</b>       |                                       |                                |                 |             | <0.001         |
| Low                            | 36.5 (12.5)                           | 5.7 (2.8)                      | 41.1 (13.0)     | 16.6 (10.3) |                |
| Medium                         | 40.1 (13.1)                           | 5.4 (2.5)                      | 35.8 (13.3)     | 18.7 (10.2) |                |
| High                           | 38.3 (11.9)                           | 5.7 (2.7)                      | 37.4 (12.7)     | 18.6 (9.5)  |                |
| <b>Occupational level</b>      |                                       |                                |                 |             | 0.076          |
| Unemployed                     | 36.1 (12.2)                           | 5.7 (2.7)                      | 39.5 (13.2)     | 18.6 (11.2) |                |
| Low                            | 37.5 (12.3)                           | 5.8 (2.6)                      | 40.0 (12.5)     | 16.7 (10.1) |                |
| Medium                         | 37.3 (12.3)                           | 6.1 (2.6)                      | 39.0 (12.8)     | 17.5 (10.2) |                |
| High                           | 37.0 (11.8)                           | 5.4 (2.7)                      | 40.2 (12.5)     | 17.4 (9.2)  |                |
| <b>Smoking status</b>          |                                       |                                |                 |             | 0.046          |
| Never                          | 39.3 (12.7)                           | 5.5 (2.7)                      | 37.5 (13.2)     | 17.7 (9.5)  |                |
| Current                        | 37.7 (12.8)                           | 5.2 (2.5)                      | 38.2 (13.1)     | 19.0 (11.5) |                |
| Former                         | 35.3 (11.5)                           | 6.0 (2.7)                      | 41.4 (13.0)     | 17.4 (10.3) |                |
| <b>Physical activity level</b> |                                       |                                |                 |             | <0.001         |
| Low                            | 39.3 (13.5)                           | 5.6 (3.1)                      | 38.3 (13.6)     | 16.8 (10.5) |                |
| Medium                         | 36.7 (12.2)                           | 5.5 (2.7)                      | 38.7 (12.4)     | 19.1 (10.0) |                |
| High                           | 40.9 (12.9)                           | 5.4 (2.7)                      | 36.5 (13.3)     | 17.2 (9.2)  |                |
| <b>Breakfast habits</b>        |                                       |                                |                 |             | 0.579          |
| Never/seldom                   | 39.5 (12.8)                           | 5.7 (2.8)                      | 36.8 (13.0)     | 18.2 (10.1) |                |
| Often/always                   | 38.2 (12.6)                           | 5.6 (2.7)                      | 38.3 (13.2)     | 17.9 (10.1) |                |
| <b>Snacking habits</b>         |                                       |                                |                 |             | 0.001          |
| Never/seldom                   | 38.0 (12.2)                           | 6.0 (2.8)                      | 40.4 (12.8)     | 15.6 (9.9)  |                |
| Often/always                   | 38.5 (12.8)                           | 5.6 (2.7)                      | 37.2 (13.2)     | 18.7 (10.1) |                |
| <b>Out-of-home eating</b>      |                                       |                                |                 |             | <0.001         |
| Never/seldom                   | 38.5 (12.9)                           | 6.0 (2.9)                      | 39.3 (13.6)     | 16.2 (10.6) |                |
| Often/always                   | 38.0 (12.4)                           | 5.1 (2.4)                      | 37.1 (12.7)     | 19.7 (9.3)  |                |

**Supplementary Table S2.** Percentage of energy shares of NOVA food groups across quintiles of the daily energy share of UPFs by age groups.

| NOVA food groups<br>(% of total dietary energy) | Quintiles of the dietary contribution of ultra-processed foods<br>(% of total dietary energy) |        |         |        |         |        |       |        |
|-------------------------------------------------|-----------------------------------------------------------------------------------------------|--------|---------|--------|---------|--------|-------|--------|
|                                                 | <35 y                                                                                         |        | 35-49 y |        | 50-65 y |        | >65 y |        |
|                                                 | Q1                                                                                            | Q5     | Q1      | Q5     | Q1      | Q5     | Q1    | Q5     |
| <i>Unprocessed or minimally processed foods</i> | 46.8                                                                                          | 31.4** | 44.9    | 33.5** | 43.6    | 30.7** | 40.2  | 29.0** |
| Red meat and poultry                            | 3.1                                                                                           | 3.1    | 2.9     | 3.0    | 2.9     | 3.4    | 2.9   | 2.7    |
| Fish and seafoods                               | 4.2                                                                                           | 3.0*   | 3.9     | 5.1*   | 3.7     | 4.8    | 3.0   | 3.2    |
| Milk and unprocessed dairy                      | 3.7                                                                                           | 2.7    | 2.3     | 2.9    | 2.4     | 1.8*   | 3.2   | 2.0*   |
| Eggs                                            | 0.1                                                                                           | 0.1    | 0.1     | 0.2*   | 0.1     | 0.2*   | 0.1   | 0.2*   |
| Grains and pasta                                | 10.0                                                                                          | 9.3    | 9.2     | 7.7**  | 9.9     | 8.7*   | 10.1  | 7.1**  |
| Fruits                                          | 10.8                                                                                          | 5.9**  | 8.4     | 6.0*   | 8.7     | 5.2**  | 6.9   | 5.2    |
| Vegetables                                      | 5.9                                                                                           | 3.1**  | 4.7     | 4.2*   | 3.9     | 2.8*   | 3.3   | 2.7*   |
| Potatoes                                        | 0.6                                                                                           | 0.6    | 0.5     | 0.6*   | 0.6     | 0.7    | 0.4   | 0.7*   |
| Nuts                                            | 2.6                                                                                           | 3.0    | 3.1     | 6.8**  | 3.4     | 2.9    | 1.7   | 3.3*   |
| Legumes                                         | 7.7                                                                                           | 4.2*   | 7.5     | 5.6**  | 4.7     | 2.9*   | 5.4   | 4.2*   |
| <i>Processed culinary ingredients</i>           | 5.6                                                                                           | 5.2    | 6.2     | 4.8*   | 6.0     | 4.4*   | 6.4   | 4.7*   |
| Plant oils                                      | 3.1                                                                                           | 2.6*   | 3.2     | 2.8*   | 3.3     | 2.2**  | 3.3   | 2.8*   |

|                              |      |        |      |        |      |        |      |        |
|------------------------------|------|--------|------|--------|------|--------|------|--------|
| Animal fats                  | 0.2  | 0.3    | 0.2  | 0.5*   | 0.1  | 0.3*   | 0.2  | 0.3    |
| Table sugar                  | 0.4  | 0.8**  | 0.5  | 0.5    | 0.3  | 0.7**  | 0.6  | 0.5*   |
| Fruit juice (natural)        | 0.5  | 0.5    | 0.6  | 0.3    | 0.8  | 0.7*   | 0.2  | 0.3    |
| <i>Processed foods</i>       | 41.5 | 31.1** | 42.1 | 27.9** | 43.8 | 32.3** | 47.8 | 31.6** |
| Breads                       | 19.6 | 9.1**  | 19.1 | 11.3** | 19.8 | 13.5*  | 21.8 | 12.8** |
| Cheese                       | 3.8  | 5.3**  | 3.5  | 4.4*   | 4.1  | 4.5    | 3.8  | 4.0*   |
| Beer, wine and liquors       | 1.9  | 2.0    | 3.6  | 3.0    | 2.8  | 3.0    | 2.9  | 3.9    |
| Processed meats (cured)      | 1.3  | 1.3    | 1.0  | 1.4*   | 1.0  | 1.8**  | 0.6  | 1.6**  |
| <i>Ultra-processed foods</i> | 6.2  | 33.3** | 6.8  | 34.7** | 6.6  | 34.1** | 5.7  | 35.8** |
| Fast foods                   | 1.4  | 7.6**  | 1.3  | 8.1**  | 0.9  | 7.3**  | 0.9  | 6.3**  |
| Ultra-processed dairy        | 0.7  | 1.6**  | 0.7  | 2.6**  | 1.1  | 1.4*   | 0.6  | 1.7**  |
| Breakfast cereals            | 0.1  | 0.9*   | 0.1  | 1.0**  | 0.1  | 0.8**  | 0.1  | 0.7**  |
| Biscuits, pastries, cakes    | 0.8  | 5.6**  | 1.2  | 7.9**  | 1.2  | 6.4**  | 1.0  | 8.9**  |
| Confectionery and creams     | 0.6  | 2.5**  | 0.5  | 4.3**  | 0.7  | 4.7**  | 0.4  | 3.1**  |
| Ice creams                   | 0.8  | 5.4**  | 0.7  | 6.5**  | 0.8  | 4.6**  | 0.7  | 7.0**  |
| Salty snacks                 | 0.2  | 2.0**  | 0.2  | 2.3**  | 0.2  | 2.1**  | 0.1  | 2.1**  |
| Carbonated soft-drinks       | 0.2  | 1.6**  | 0.2  | 1.2**  | 0.1  | 1.4**  | 0.1  | 1.1**  |
| Margarine                    | 0.0  | 0.3    | 0.0  | 0.5*   | 0.0  | 0.1*   | 0.0  | 0.1    |
| Alcoholic-distilled drinks   | 0.1  | 0.3    | 0.3  | 0.6*   | 0.1  | 1.0**  | 0.1  | 0.5*   |

|                     |     |      |     |      |     |       |     |       |
|---------------------|-----|------|-----|------|-----|-------|-----|-------|
| Confectioned juices | 0.2 | 1.3* | 0.1 | 1.1* | 0.1 | 1.8** | 0.1 | 1.0** |
|---------------------|-----|------|-----|------|-----|-------|-----|-------|

---

\* denotes  $P < 0.05$ , \*\* denotes  $P < 0.001$  as statistically significant difference between all quintiles of UPF intake.

**Supplementary Table S3.** Mean (and standard deviation) total energy intake and nutrient content of the overall diet according to quintiles of the energy share of UPFs by age groups.

| NOVA food groups          | Quintiles of the dietary contribution of ultra-processed foods<br>(% of total dietary energy) |                    |                    |                       |                    |                    |                    |                      |
|---------------------------|-----------------------------------------------------------------------------------------------|--------------------|--------------------|-----------------------|--------------------|--------------------|--------------------|----------------------|
|                           | <35 y                                                                                         |                    | 35-49 y            |                       | 50-65 y            |                    | >65 y              |                      |
|                           | Q1                                                                                            | Q5                 | Q1                 | Q5                    | Q1                 | Q5                 | Q1                 | Q5                   |
| Energy (kcal)             | 2200.6<br>(1030.6)                                                                            | 2229.4<br>(1083.1) | 2075.8<br>(868.1)  | 2590.0<br>(1380.0)**  | 2039.3<br>(580.6)  | 2323.2<br>(919.9)  | 1911.0<br>(560.3)  | 2330.3<br>(745.6)**  |
| Energy (KJ)               | 8896.7<br>(4350.2)                                                                            | 9037.5<br>(4456.3) | 8420.6<br>(3602.3) | 10573.7<br>(5753.4)** | 8237.5<br>(2421.2) | 9397.0<br>(3807.7) | 7729.4<br>(2289.2) | 9470.9<br>(3131.2)** |
| Protein (g/d)             | 100.4<br>(58.1)                                                                               | 91.2<br>(47.6)*    | 92.3<br>(57.3)     | 105.7<br>(67.7)       | 86.2<br>(25.0)     | 95.7<br>(45.6)     | 81.0<br>(26.0)     | 86.9<br>(32.4)       |
| Lipids (g/d)              | 55.6<br>(23.6)                                                                                | 76.8<br>(39.4)**   | 52.2<br>(23.5)     | 90.9<br>(52.3)**      | 52.8<br>(15.1)     | 79.3<br>(32.1)**   | 47.1<br>(14.3)     | 79.9<br>(23.5)**     |
| Cholesterol (mg/d)        | 179.0<br>(128.1)                                                                              | 241.5<br>(120.7)** | 174.7<br>(152.7)   | 294.5<br>(192.0)**    | 163.2<br>(67.3)    | 272.3<br>(140.9)** | 152.7<br>(64.2)    | 245.7<br>(87.0)**    |
| Saturated fatty acids (%) | 20.2<br>(8.2)                                                                                 | 31.3<br>(15.8)**   | 18.7<br>(8.5)      | 36.9<br>(20.8)**      | 20.0<br>(7.0)      | 38.8<br>(14.2)**   | 18.4<br>(6.4)      | 32.7<br>(9.5)**      |
| MUFA (%)                  | 24.4<br>(9.2)                                                                                 | 30.4<br>(14.9)**   | 22.6<br>(8.0)      | 35.8<br>(19.7)**      | 23.5<br>(6.1)      | 31.4<br>(12.7)**   | 21.3<br>(5.8)      | 31.8<br>(2.3)**      |
| PUFA (%)                  | 11.7<br>(5.9)                                                                                 | 12.7<br>(8.4)*     | 11.0<br>(6.0)      | 14.9<br>(10.5)**      | 10.5<br>(3.3)      | 13.3<br>(6.1)*     | 9.5<br>(3.2)       | 13.6<br>(6.0)**      |
| Total n-3 PUFA (%)        | 1.9<br>(1.1)                                                                                  | 1.2<br>(0.7)       | 1.6<br>(0.7)       | 1.8<br>(1.2)*         | 1.8<br>(0.8)       | 2.0<br>(1.3)       | 1.6<br>(0.7)       | 1.9<br>(1.1)         |

|                         |                    |                      |                    |                     |                    |                     |                    |                     |
|-------------------------|--------------------|----------------------|--------------------|---------------------|--------------------|---------------------|--------------------|---------------------|
| Seafood n-3 PUFA (%)    | 0.7<br>(0.9)       | 0.4 (0.3)*           | 0.4<br>(0.4)       | 0.6<br>(0.7)        | 0.6<br>(0.6)       | 0.8<br>(1.1)        | 0.5<br>(0.5)       | 0.5<br>(0.5)        |
| Plant n-3 PUFA (%)      | 1.2<br>(0.5)       | 1.2<br>(0.7)         | 1.1<br>(0.5)       | 1.2<br>(0.7)*       | 1.2<br>(0.4)       | 1.2<br>(0.5)        | 1.0<br>(0.4)       | 1.3<br>(1.0)*       |
| Carbohydrates (g/d)     | 338.9<br>(181.5)   | 305.8<br>(152.0)*    | 312.6<br>(145.2)   | 345.0<br>(176.4)*   | 312.1<br>(108.9)   | 313.2<br>(135.9)    | 296.0<br>(101.7)   | 318.2<br>(126.3)    |
| Total fiber (g/d)       | 47.5<br>(45.3)     | 29.9<br>(19.4)**     | 41.8 (30.3)        | 35.7 (26.1)*        | 38.7 (13.6)        | 28.2<br>(14.4)**    | 33.4<br>(13.6)     | 31.2<br>(16.3)*     |
| Sodium (mg/d)           | 2951.8<br>(1198.3) | 3241.3<br>(1700.3)   | 2824.9<br>(1181.4) | 3176.6<br>(1487.6)  | 2772.3<br>(1082.0) | 3302.0<br>(1685.9)* | 2523.0<br>(899.5)  | 2932.7<br>(1235.4)* |
| Potassium (mg/d)        | 5013.8<br>(4019.7) | 3759.9<br>(2043.3)** | 4493.8<br>(3161.8) | 4571.7<br>(3159.6)* | 4215.0<br>(1343.3) | 3783.6<br>(1798.0)  | 3489.2<br>(1128.9) | 3709.0<br>(1734.7)  |
| Vitamin A (retinol eq.) | 1196.0<br>(1008.1) | 860.5<br>(464.5)**   | 967.0<br>(625.4)   | 962.6<br>(507.9)    | 1064.6<br>(483.2)  | 856.4<br>(559.2)*   | 784.8<br>(343.8)   | 829.8<br>(475.2)    |
| Vitamin C (mg/d)        | 254.8<br>(272.3)   | 146.5<br>(102.5)**   | 219.2<br>(202.3)   | 173.9<br>(143.4)*   | 216.6<br>(118.2)   | 160.3<br>(143.0)**  | 147.3<br>(69.9)    | 134.8<br>(95.7)     |
| Vitamin E (mg/d)        | 10.2<br>(5.5)      | 9.4<br>(5.1)         | 9.1<br>(4.5)       | 11.5<br>(7.1)**     | 8.9<br>(2.5)       | 9.4<br>(4.6)        | 7.8<br>(2.3)       | 9.7<br>(4.7)*       |
| Vitamin D (mg/d)        | 6.0<br>(6.2)       | 5.2<br>(7.0)         | 5.2<br>(5.9)       | 8.9<br>(12.1)*      | 5.8<br>(5.2)       | 8.5<br>(11.6)*      | 4.8<br>(3.7)       | 5.4<br>(4.7)        |
| Vitamin B12 (mg/d)      | 8.3<br>(17.3)      | 7.5<br>(5.3)         | 9.1<br>(21.1)      | 9.6<br>(8.6)        | 5.6<br>(5.2)       | 9.1<br>(9.0)**      | 5.0<br>(2.4)       | 7.1<br>(6.6)*       |

\* denotes  $P < 0.05$ , \*\* denotes  $P < 0.001$  as statistically significant difference between all quintiles of UPF intake.

**Supplementary Table S4.** Percentage (and standard deviations) of UPF consumption in individuals meeting and not meeting the European and Italian nutritional recommendations for selected macro- and micro-nutrients.

|               | <b>EFSA recommendations</b> |                | <i>P-value</i> | <b>LARN recommendations</b> |                | <i>P-value</i> |
|---------------|-----------------------------|----------------|----------------|-----------------------------|----------------|----------------|
|               | <i>Not meeting</i>          | <i>Meeting</i> |                | <i>Not meeting</i>          | <i>Meeting</i> |                |
| Carbohydrates | 15.3 (8.2)                  | 20.1 (10.9)    | <0.001         | 15.3 (8.2)                  | 20.1 (10.3)    | <0.001         |
| Protein       | 18.8 (11.7)                 | 17.7 (9.7)     | 0.068          | 18.6 (11.4)                 | 17.7 (9.7)     | 0.118          |
| Fat           | 18.4 (10.1)                 | 12.5 (8.0)     | <0.001         | 18.4 (10.1)                 | 12.5 (8.0)     | <0.001         |
| Fiber         | 20.7 (11.1)                 | 16.6 (9.4)     | <0.001         | 22.0 (10.8)                 | 15.2 (8.6)     | <0.001         |
| Sodium        | 19.2 (10.0)                 | 13.0 (9.5)     | <0.001         | 18.3 (9.9)                  | 16.5 (11.0)    | 0.002          |
| Potassium     | 18.6 (10.4)                 | 17.3 (9.8)     | 0.007          | 18.2 (10.0)                 | 17.5 (10.3)    | 0.174          |
| Vitamin A     | 18.4 (10.4)                 | 17.6 (10.0)    | 0.079          | 18.8 (10.7)                 | 17.5 (9.8)     | 0.009          |
| Vitamin B12   | 15.4 (11.0)                 | 18.8 (9.7)     | <0.001         | 16.0 (12.6)                 | 18.0 (10.0)    | 0.107          |
| Vitamin C     | 20.4 (11.0)                 | 17.0 (9.6)     | <0.001         | 20.7 (11.2)                 | 17.1 (9.6)     | <0.001         |
| Vitamin D     | 17.8 (10.1)                 | 20.8 (10.2)    | 0.003          | 17.8 (10.1)                 | 20.8 (10.2)    | 0.003          |
| Vitamin E     | 17.4 (9.7)                  | 19.7 (11.4)    | <0.001         | 12.3 (9.6)                  | 20.7 (11.7)    | <0.001         |

**Supplementary Table S5.** Percent distribution and standard deviations of food group consumption by level of processing across level of adherence to selected a-priori defined healthy dietary patterns. P-values indicate statistical differences in ultra-processed food (UPF) consumption between groups.

|                           | Unprocessed/<br>minimally<br>processed<br>foods | Processed<br>culinary<br>ingredients | Processed<br>foods | UPFs        | <i>P-value</i> |
|---------------------------|-------------------------------------------------|--------------------------------------|--------------------|-------------|----------------|
|                           | <i>mean % (SD)</i>                              |                                      |                    |             | <0.001         |
| <b>Mediterranean diet</b> |                                                 |                                      |                    |             |                |
| <i>Low</i>                | 36.2 (12.2)                                     | 5.9 (2.8)                            | 38.6 (12.3)        | 19.8 (10.4) |                |
| <i>Medium</i>             | 40.9 (12.8)                                     | 5.5 (2.6)                            | 38.1 (14.6)        | 16.0 (9.5)  |                |
| <i>High</i>               | 43.9 (11.4)                                     | 5.2 (2.3)                            | 37.2 (12.8)        | 14.7 (8.4)  |                |
| <b>DASH diet</b>          |                                                 |                                      |                    |             | <0.001         |
| <i>Low</i>                | 32.6 (11.8)                                     | 6.3 (3.1)                            | 39.3 (13.5)        | 22.4 (11.9) |                |
| <i>Medium</i>             | 39.1 (12.4)                                     | 5.7 (2.6)                            | 37.4 (12.8)        | 18.3 (10.0) |                |
| <i>High</i>               | 41.9 (12.5)                                     | 5.3 (2.5)                            | 39.5 (13.9)        | 14.1 (7.5)  |                |
| <b>A-HEI</b>              |                                                 |                                      |                    |             | <0.001         |
| <i>Low</i>                | 33.7 (12.6)                                     | 6.1 (2.8)                            | 40.9 (12.8)        | 19.8 (10.8) |                |
| <i>Medium</i>             | 38.6 (11.5)                                     | 5.7 (2.4)                            | 38.7 (13.3)        | 17.6 (10.0) |                |
| <i>High</i>               | 43.7 (11.9)                                     | 5.3 (2.8)                            | 35.2 (12.9)        | 16.4 (9.1)  |                |
| <b>DQI-I</b>              |                                                 |                                      |                    |             | <0.001         |
| <i>Low</i>                | 33.0 (12.0)                                     | 5.9 (3.0)                            | 37.2 (13.2)        | 24.5 (10.8) |                |
| <i>Medium</i>             | 38.9 (11.6)                                     | 6.0 (2.8)                            | 38.2 (12.3)        | 17.6 (9.2)  |                |
| <i>High</i>               | 42.6 (12.6)                                     | 5.2 (2.2)                            | 39.1 (14.0)        | 13.6 (7.7)  |                |
